# Supplementary material
Source: PubMed Central journal article supplement (PMC5379854)
Supplement: NIHMS638027-supplement-supp_mat.pdf [file NIHMS638027-supplement-supp_mat.pdf]

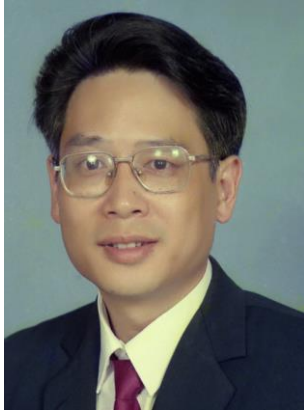

**Dr. Weijun Xuan M.D., Ph.D** worked as a physician from 1983, an associate professor and director from 1996, a professor from 2003 at Dept. of Otolaryngology in Guangxi University of Chinese Medicine, P.R. China, during this time he also received MM from Henan Medical University, and Ph.D from Huazhong University of Science and Technology, P.R. China. He served as a visiting professor and research scientist at Massachusetts Eye and Ear Infirmary, and Massachusetts General Hospital, Harvard Medical School in 2008-2012.

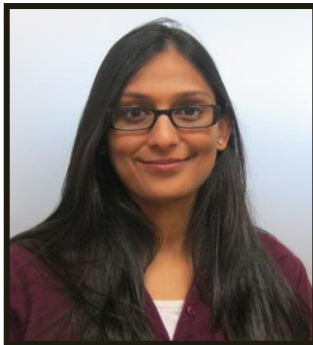

**Tanupriya Agrawal, M.D., Ph.D.** completed her medical degree in 2006 from Netaji Subhash Chand Bose Government Medical College, Jabalpur, India followed by Ph.D. in Biomedical Sciences at Creighton University, Omaha, NE. Currently she is a visiting postdoctoral fellow at Dr. Hamblin's lab at The Wellman Center for Photomedicine, Massachusetts General Hospital, Boston, MA. She is also an in training pathology resident at Tufts Medical Center, Boston MA. Tanupriya has published 6 peer-reviewed articles and 12 conference proceedings including one oral presentation. She is investigating the role and underlying molecular mechanisms of low level laser therapy in neurogenesis and synaptogenesis in mouse model of traumatic brain injury.

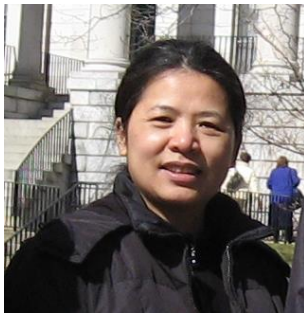

**Dr. Liyi Huang** received her MD and PhD from Guangxi Medical University, P.R. China, at which she engaged in the clinical work of infectious diseases as a physician, an associate professor, a professor in succession from 1996. She was trained as a post-doctoral fellow and worked as a research fellow at Massachusetts General Hospital, Harvard Medical School from 2007-2012.

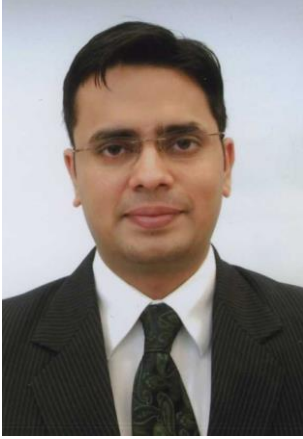

**Gaurav K. Gupta, M.D., Ph.D.** is a resident physician at Tufts Medical Center and visiting postdoctoral research fellow at Dr. Hamblin's lab at The Wellman Center for Photomedicine, Massachusetts General Hospital, Boston, MA. Prior to this, he finished medical school and residency training in Clinical Biochemistry at J. N. Medical College, Aligarh, India followed by Ph.D. in Biomedical Sciences at Creighton University, Omaha, NE. He has published 12 peer-reviewed articles and 15 conference proceedings. He is review editor of inflammation and in the editorial board of several journals.

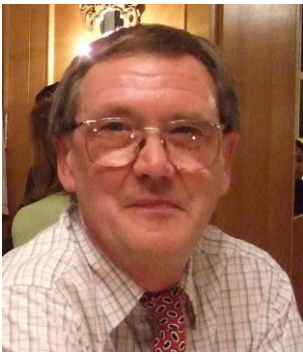

**Michael R Hamblin Ph.D.** is a Principal Investigator at the Wellman Center for Photomedicine at Massachusetts General Hospital, an Associate Professor of Dermatology at Harvard Medical School and is affiliated faculty at Harvard-MIT Division of Health Science and Technology. His research interests include photodynamic therapy (PDT) for infections, cancer, and in low-level light therapy (LLLT) for wound healing, traumatic brain injury and hair regrowth. He directs a laboratory of around a sixteen post-doctoral fellows, visiting scientists and graduate students. His research is supported by NIH, CDMRP, USAFOSR and CIMIT. He has published 244 peer-reviewed articles, 150 conference proceedings, book chapters and 8 patents. He is Associate Editor for 7 journals, and serves on NIH Study Sections. Dr Hamblin chairs SPIE Photonics West conference "Mechanisms for low level light therapy" and has edited the 10 proceedings volumes together with four major textbooks on PDT and photomedicine. In 2011 Dr Hamblin was honored by election as a Fellow of SPIE.
